# Supplementary material for: Extraction of Nb(v) by quaternary ammonium-based solvents: toward organic hexaniobate systems
Source: Royal Society of Chemistry journal article supplement (doi:10.1039/c6dt03873e), 2016-01-01
Supplement: c6dt03873e1.pdf [file c6dt03873e1.pdf]

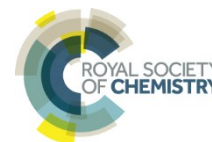

Journal Name

ARTICLE

## Extraction of Nb(V) by quaternary ammonium-based solvents: toward organic hexaniobate systems

Received 00th January 20xx,  
Accepted 00th January 20xx

Gauthier J-P. Deblonde,<sup>a,b\*</sup> Alexandre Chagnes,<sup>a,c</sup> Marie-Aude Roux,<sup>b</sup> Valérie Weigel,<sup>b</sup> and Gérard Cote<sup>a</sup>

DOI: 10.1039/x0xx00000x

[www.rsc.org/](http://www.rsc.org/)

### SUPPORTING INFORMATION

**Table S 1:** Extraction yield of Nb for various quaternary ammonium salts. Initial aqueous phase: 3.4 mM  $\text{Na}_7\text{HfNb}_6\text{O}_{19}\cdot 15\text{H}_2\text{O}$ , pH = 12 (NaOH 10 mM). Initial organic phase: 44.7 mM of quaternary ammonium diluted in Elixore 205 + 1% (v/v) isotridecanol. Extraction: 1 contact,  $V_{\text{org}}/V_{\text{aq}} = 1$ ,  $t = 30$  min,  $T = 25$  °C.

| Quaternary ammonium salt                     | Nb yield | Extraction |
|----------------------------------------------|----------|------------|
| Aliquat® 336 <sup>a</sup>                    | ≥ 99.9 % |            |
| Methyltrioctylammonium chloride <sup>a</sup> | ≥ 99.9 % |            |
| Methyltrioctylammonium bromide <sup>a</sup>  | 94.0 %   |            |
| Sulfated Aliquat® 336 <sup>b</sup>           | ≥ 99.9 % |            |
| Carbonated Aliquat® 336 <sup>c</sup>         | ≥ 99.9 % |            |
| Hydroxide of Aliquat® 336 <sup>d</sup>       | ≥ 99.9 % |            |

a: commercial compound. b: obtained by pre-contacting the solvent with 1 M  $\text{H}_2\text{SO}_4$  for 30 min ( $V_{\text{org}}/V_{\text{aq}} = 1/3$ ). c: obtained by pre-contacting the solvent with 1 M  $\text{Na}_2\text{CO}_3$  for 30 min ( $V_{\text{org}}/V_{\text{aq}} = 1/3$ ). d: obtained by pre-contacting the solvent with 1 M NaOH for 30 min ( $V_{\text{org}}/V_{\text{aq}} = 1/3$ ).

**Table S2.** Influence on the nature of the alkali cation on the extraction yield of hexaniobates. Initial aqueous phase: 0.18 mM  $\text{Na}_7\text{HfNb}_6\text{O}_{19}\cdot 15\text{H}_2\text{O}$  + 50 mM AlCl and 10 mM AOH (A = Li, Na or K). Initial organic phase: 9.0 mM of Aliquat® 336 diluted in Elixore 205 + 1% (v/v) isotridecanol. Extraction: 1 contact,  $V_{\text{org}}/V_{\text{aq}} = 2$ ,  $t = 15$  min,  $T = 25$  °C.

| Alkali system | Nb yield | Extraction |
|---------------|----------|------------|
| LiCl/LiOH     | 94.4 %   |            |
| NaCl/NaOH     | 90.7 %   |            |
| KCl/KOH       | 89.5 %   |            |

<sup>a</sup> PSL Research University, Chimie ParisTech - CNRS, Institut de Recherche de Chimie Paris, 11 rue Pierre et Marie Curie, 75005 Paris, France.

<sup>b</sup> Eramet Research, Hydrometallurgy department, F-78193 Trappes, France.

<sup>c</sup> University of Lorraine, GeoResources Lab, UMR CNRS 7359, 2 Rue Doyen Marcel Roubault, TSA 70605, 54518 Vandoeuvre Les Nancy, France

\* E-mail: [gauthier.deblonde@alumni.chimie-paristech.fr](mailto:gauthier.deblonde@alumni.chimie-paristech.fr)

Electronic Supplementary Information (ESI) available: [details of any supplementary information available should be included here]. See DOI: 10.1039/x0xx00000x

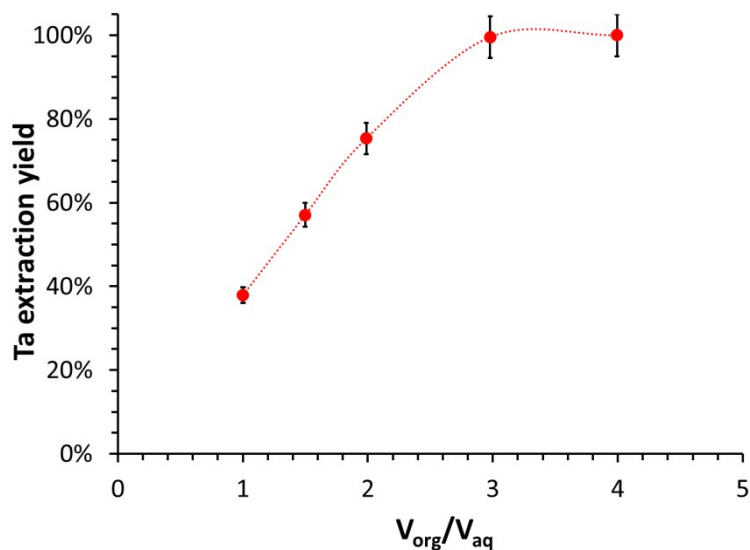

**Figure S1.** Extraction yields measured for Ta as a function of the volume phase ratio. Organic phase: 8.84 mM Aliquat® 336 diluted in Elixore 205 + 1% (v/v) isotridecanol. Initial aqueous phase: 3 mM  $\text{Na}_8\text{Ta}_6\text{O}_{19} \cdot 24.5\text{H}_2\text{O}$ . Background electrolyte: 10 mM NaOH. Extraction: 1 contact,  $t = 30$  min,  $T = 25$  °C,  $\text{pH}_{\text{eq}} = 11.9 \pm 0.1$ . Error bars:  $\pm 5\%$ .

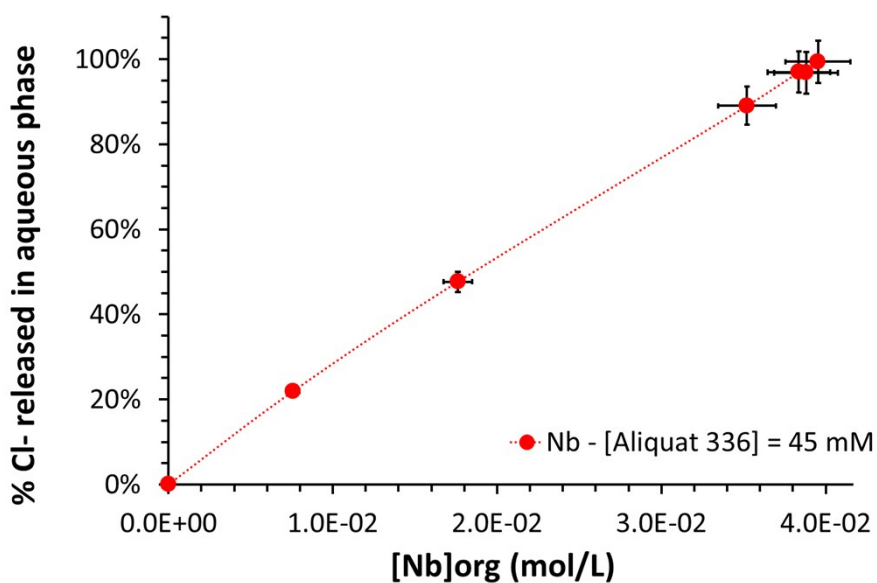

**Figure S2.** Percentage of chloride ions released by Aliquat® 336 (quaternary ammonium chloride) during the extraction of hexaniobate ions. Initial organic phase: 44.7 mM Aliquat® 336 diluted in Elixore 205 + 1% (v/v) isotridecanol. Initial aqueous phase:  $\text{Na}_7\text{HNB}_6\text{O}_{19} \cdot 15\text{H}_2\text{O}$  dissolved in 10 mM NaOH 10 mM ( $\text{pH}_{\text{eq}} = 11.9 \pm 0.1$ ). The volume phase ratio ( $V_{\text{organic}}/V_{\text{aqueous}}$ ) was varied from 0.25 to 2.7. Extraction: 1 contact,  $t = 30$  min. Error bars:  $\pm 5\%$ .  $T = 25$  °C.

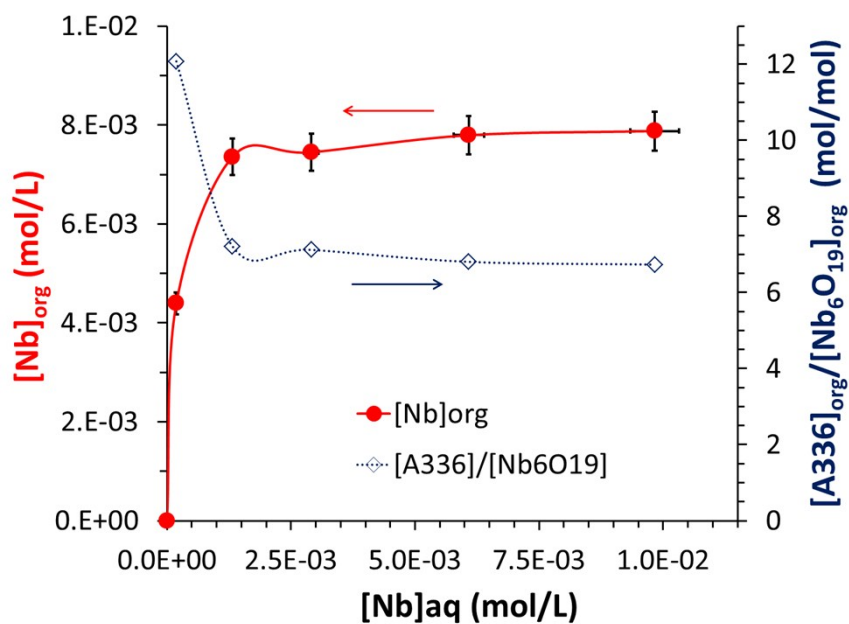

**Figure S3.** Extraction isotherme for  $\text{Na}_7\text{HfNb}_6\text{O}_{19}\cdot 15\text{H}_2\text{O}$ . Red curve, left axis: Concentration of Nb in the organic phase as a function of the concentration of Nb in the aqueous phase. Blue-dotted curve, right axis: corresponding ratio extractant/hexaniobate in the organic phase. Initial organic phase: 8.84 mM Aliquat® 336 diluted in Elixore 205 + 1% (v/v) isotridecanol. Initial aqueous phase: 3 mM  $\text{Na}_7\text{HfNb}_6\text{O}_{19}\cdot 15\text{H}_2\text{O}$  dissolved in 10 mM NaOH 10 mM ( $\text{pH}_{\text{eq}} = 11.9 \pm 0.1$ ). Different volume phase ratios were used ( $V_{\text{organic}}/V_{\text{aqueous}} = 0.75$  to 4.0) in order to obtain various concentrations of Nb in the organic phase until the solvent was saturated in hexaniobates. Extraction: 1 contact,  $t = 30$  min. Error bars:  $\pm 5\%$ .  $T = 25$  °C.
